# Supplementary material
Source: MDPI journal article supplement (https://www.mdpi.com/2073-4441/12/1/125)
Supplement: s1 [file s1]

## Supplementary materials

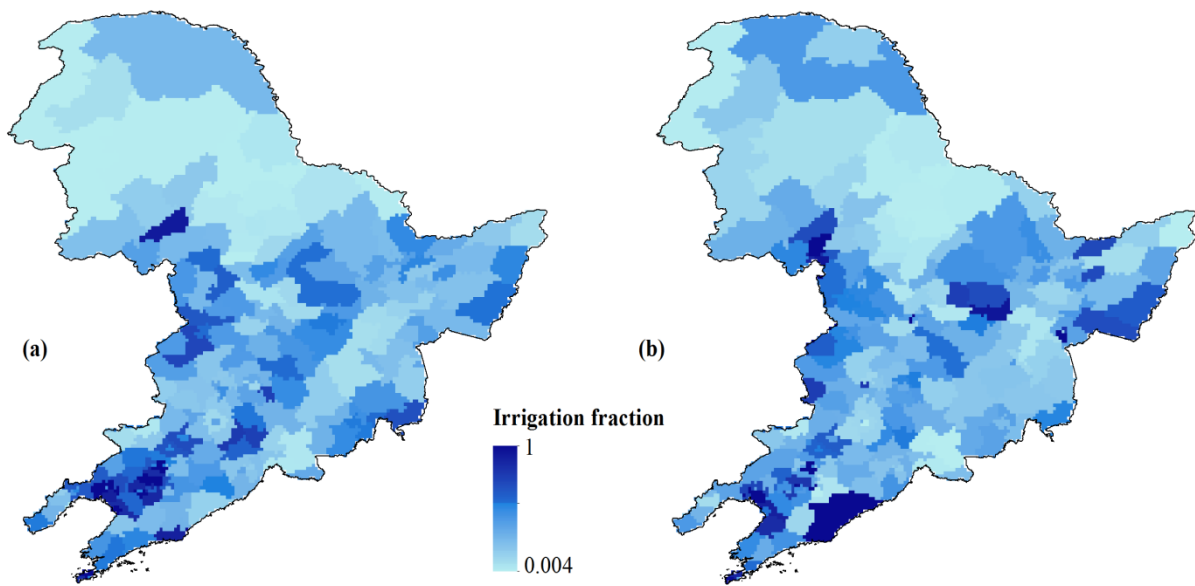

**Figure S1.** Fraction of the irrigated area in 2000 (a) and 2010 (b).

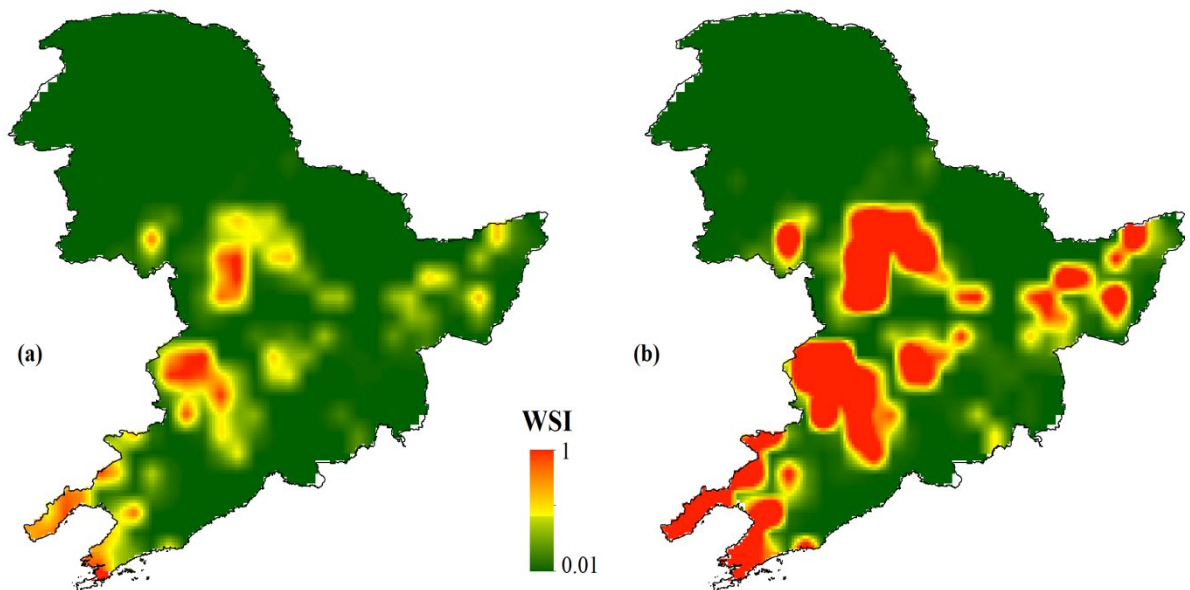

**Figure S2.** Water scarcity index (WSI) for 2000 (a) and 2010 (b). White indicates no data or no crop.

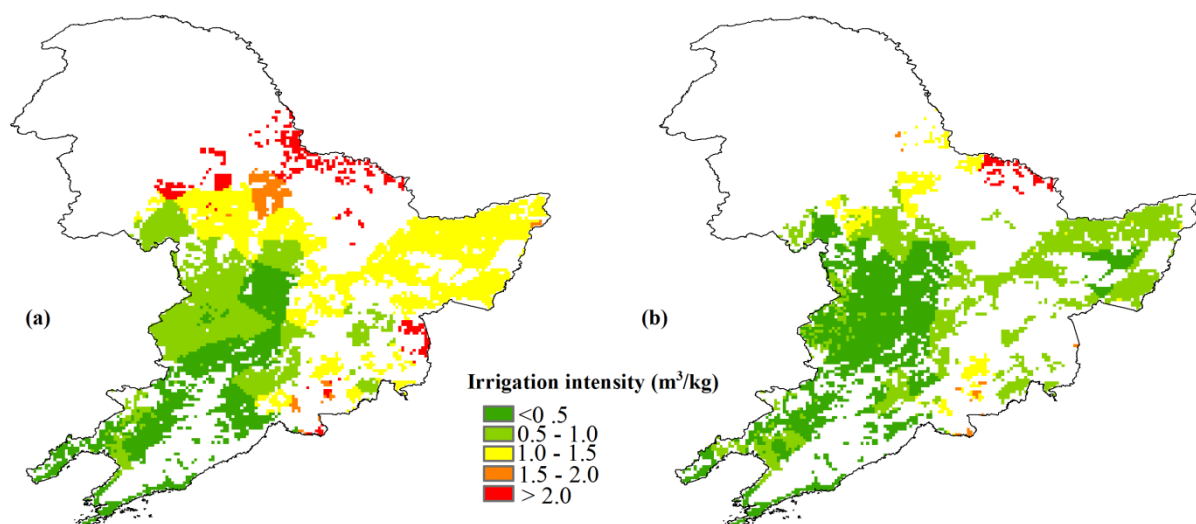

**Figure S3.** The irrigation intensity of rice ( $\text{m}^3/\text{kg}$ ). (a) is for 2000 and (b) is for 2010. White indicates no data or no rice.

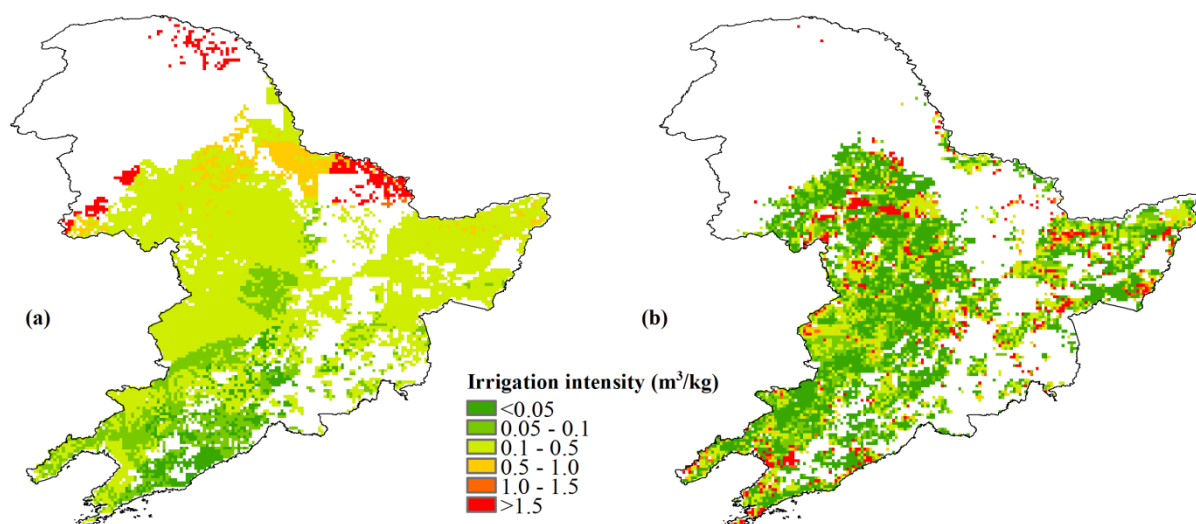

**Figure S4.** The irrigation intensity of maize ( $\text{m}^3/\text{kg}$ ). (a) is for 2000 and (b) is for 2010. White indicates no data or no maize.
